# Supplementary material for: Reproducibility of NMR Analysis of Urine Samples: Impact of Sample Preparation, Storage Conditions, and Animal Health Status
Source: Hindawi journal article supplement (doi:10.1155/2013/878374), 2013-01-01
Supplement: f1 [file 878374.f1.pdf]

**Reproducibility of NMR analysis of urine samples: impact of sample preparation,  
storage conditions and animal health status**

Christina Schreier<sup>1</sup>, Werner Kremer<sup>1,2</sup>, Fritz Huber<sup>1</sup>, Sindy Neumann<sup>1</sup>, Philipp Pagel<sup>1</sup>, Kai  
Lienemann<sup>3</sup>, Sabine Pestel<sup>4,\*</sup>

**SUPPLEMENT**

**Supplement table 1: measured pH values of the stability test samples**

|                            |        | <b>Natrosol</b> | <b>Dilution<br/>[Δ%]</b> | <b>Furosemide</b> | <b>Dilution<br/>[Δ%]</b> | <b>HCBD</b> | <b>Dilution<br/>[Δ%]</b> |
|----------------------------|--------|-----------------|--------------------------|-------------------|--------------------------|-------------|--------------------------|
| <b>Original<br/>Sample</b> | Before | 6.40            | -                        | 6.63              | -                        | 6.79        | -                        |
|                            | After  | 7.06            |                          | 7.25              |                          | 7.25        |                          |
| <b>pH 3</b>                | Before | 2.90            | 5.56                     | 2.94              | 2.99                     | 2.90        | 5.45                     |
|                            | After  | 6.62            |                          | 6.92              |                          | 6.78        |                          |
| <b>pH 4</b>                | Before | 3.83            | 3.90                     | 3.99              | 1.89                     | 4.04        | 3.35                     |
|                            | After  | 6.75            |                          | 7.05              |                          | 6.95        |                          |
| <b>pH 5</b>                | Before | 4.76            | 2.35                     | 5.05              | 0.98                     | 5.00        | 1.89                     |
|                            | After  | 6.87            |                          | 7.15              |                          | 7.08        |                          |
| <b>pH 6</b>                | Before | 5.97            | 0.64                     | 6.04              | 0.41                     | 6.02        | 0.91                     |
|                            | After  | 6.92            |                          | 7.21              |                          | 7.17        |                          |
| <b>pH 6.5</b>              | Before | 6.47            | 0.39                     | 6.41              | 0.15                     | 6.49        | 0.38                     |
|                            | After  | 7.11            |                          | 7.25              |                          | 7.23        |                          |
| <b>pH 7</b>                | Before | 6.96            | 1.72                     | 6.95              | 0.15                     | 6.96        | 0.27                     |
|                            | After  | 7.23            |                          | 7.29              |                          | 7.30        |                          |
| <b>pH 7.5</b>              | Before | 7.32            | 2.68                     | 7.46              | 0.38                     | 7.49        | 0.91                     |
|                            | After  | 7.34            |                          | 7.31              |                          | 7.38        |                          |
| <b>pH 8</b>                | Before | 8.18            | 4.26                     | 7.90              | 0.61                     | 8.02        | 1.37                     |
|                            | After  | 7.48            |                          | 7.34              |                          | 7.42        |                          |
| <b>pH 9</b>                | Before | 8.84            | 5.11                     | 9.15              | 1.54                     | 9.02        | 2.62                     |
|                            | After  | 7.64            |                          | 7.47              |                          | 7.57        |                          |

Rats were treated with natrosol, furosemide or HCBD and urine was collected at 0 - 8 h for furosemide and at 8 - 24 h for natrosol and HCBD. Original samples were titrated with 1 N NaOH or 1 N HCl according to a previously defined algorithm to achieve the target pH. Achieved pH values of the samples were measured before and after addition of phosphate buffer used for sample preparation for  $^1\text{H}$  NMR measurements. Additionally, dilution factors from the addition of 1 N NaOH or 1 N HCl are calculated in % deviation as compared to the original sample.

**Supplement table 2: salt concentrations and measured osmolality of the stability test samples**

|                        | <b>Concentration / Osmolality</b> | <b>Natrosol</b> | <b>Furosemide</b> | <b>HCBD</b> | <b>Dilution [Δ%]</b> |
|------------------------|-----------------------------------|-----------------|-------------------|-------------|----------------------|
| <b>Original Sample</b> | Na <sup>+</sup> [mmol/L]          | 24              | 87                | 17          | -                    |
|                        | Cl <sup>-</sup> [mmol/L]          | 45              | 152               | 45          |                      |
|                        | Osm [mosm/L]                      | 562             | 403               | 477         |                      |
| <b>2-fold</b>          | Na <sup>+</sup> [mmol/L]          | 74              | 136               | 67          | 0.84                 |
|                        | Cl <sup>-</sup> [mmol/L]          | 95              | 201               | 95          |                      |
|                        | Osm [mosm/L]                      | 634             | 469               | 522         |                      |
| <b>3-fold</b>          | Na <sup>+</sup> [mmol/L]          | 124             | 186               | 117         | 1.67                 |
|                        | Cl <sup>-</sup> [mmol/L]          | 145             | 250               | 145         |                      |
|                        | Osm [mosm/L]                      | 704             | 517               | 620         |                      |
| <b>4-fold</b>          | Na <sup>+</sup> [mmol/L]          | 174             | 235               | 167         | 2.51                 |
|                        | Cl <sup>-</sup> [mmol/L]          | 195             | 299               | 195         |                      |
|                        | Osm [mosm/L]                      | 764             | 589               | 771         |                      |
| <b>6-fold</b>          | Na <sup>+</sup> [mmol/L]          | 272             | 333               | 266         | 4.16                 |
|                        | Cl <sup>-</sup> [mmol/L]          | 293             | 396               | 293         |                      |
|                        | Osm [mosm/L]                      | 916             | 713               | 911         |                      |
| <b>8-fold</b>          | Na <sup>+</sup> [mmol/L]          | 372             | 431               | 365         | 5.82                 |
|                        | Cl <sup>-</sup> [mmol/L]          | 392             | 492               | 392         |                      |
|                        | Osm [mosm/L]                      | 1028            | 848               | 993         |                      |
| <b>10-fold</b>         | Na <sup>+</sup> [mmol/L]          | 471             | 529               | 465         | 7.48                 |
|                        | Cl <sup>-</sup> [mmol/L]          | 491             | 590               | 491         |                      |
|                        | Osm [mosm/L]                      | 1178            | 980               | n.a.        |                      |
| <b>15-fold</b>         | Na <sup>+</sup> [mmol/L]          | 719             | 775               | 713         | 11.64                |
|                        | Cl <sup>-</sup> [mmol/L]          | 7388            | 833               | 738         |                      |
|                        | Osm [mosm/L]                      | 1529            | 1307              | 1765        |                      |
| <b>20-fold</b>         | Na <sup>+</sup> [mmol/L]          | 971             | 1024              | 965         | 15.85                |
|                        | Cl <sup>-</sup> [mmol/L]          | 989             | 1079              | 989         |                      |
|                        | Osm [mosm/L]                      | 1900            | 1696              | 1803        |                      |

Rats were treated with natrosol, furosemide or HCBD and urine was collected at 0 - 8 h for furosemide and at 8 - 24 h for natrosol and HCBD.  $\text{Na}^+$  and  $\text{Cl}^-$  concentrations were measured in the original samples, and were calculated for the modified samples, since high electrolyte concentrations can not be measured directly. Therefore, osmolality was measured in all samples as a surrogate for electrolyte ( $\text{Na}^+$  and  $\text{Cl}^-$ ) measurements. Dilution factors from addition of 35 % NaCl solution are calculated as relative deviation from the original sample in % ( $\Delta\%$ ). Abbreviation: n.a. not available

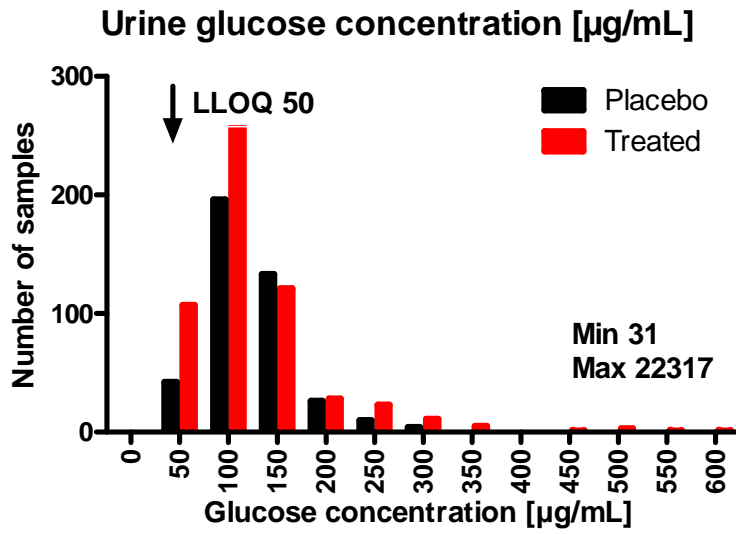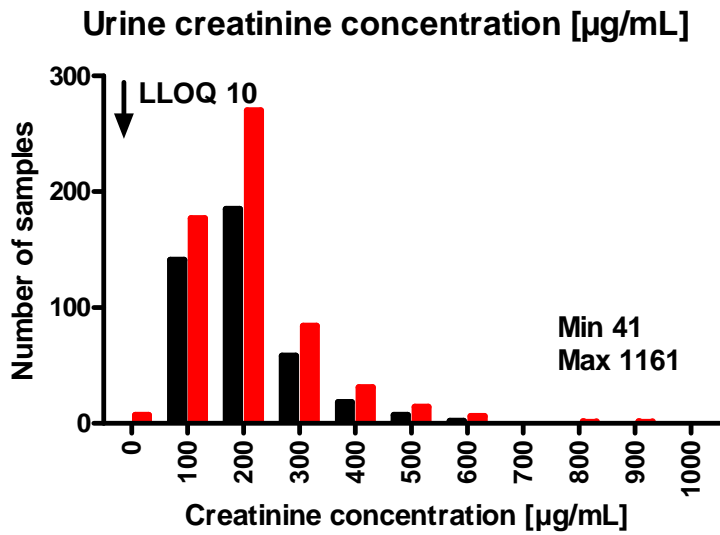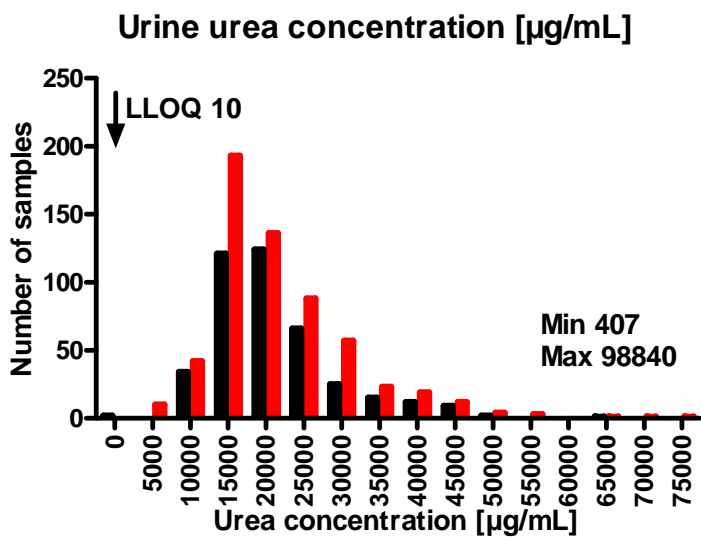

**Supplement Figure 1: glucose, creatinine and urea concentrations in rat urine**

Male and female rats were treated with natrosol, furosemide, formoterol, spironolactone, amiloride, acetaminophen, adriamycine or hydrochlorothiazide and urine was collected at 0 - 4 h, 4 - 8 h and 8 - 24 h post administration. Rats were fed before the experiment and fasted during the experiment, leading to a mixture of urine samples from fed and fasted animals. Glucose, creatinine and urea concentrations were measured, and histograms were plotted showing normal and pharmacological ranges of the parameters. Data include samples from 411 vehicle-treated animals and 592 - 593 reference compound-treated animals.

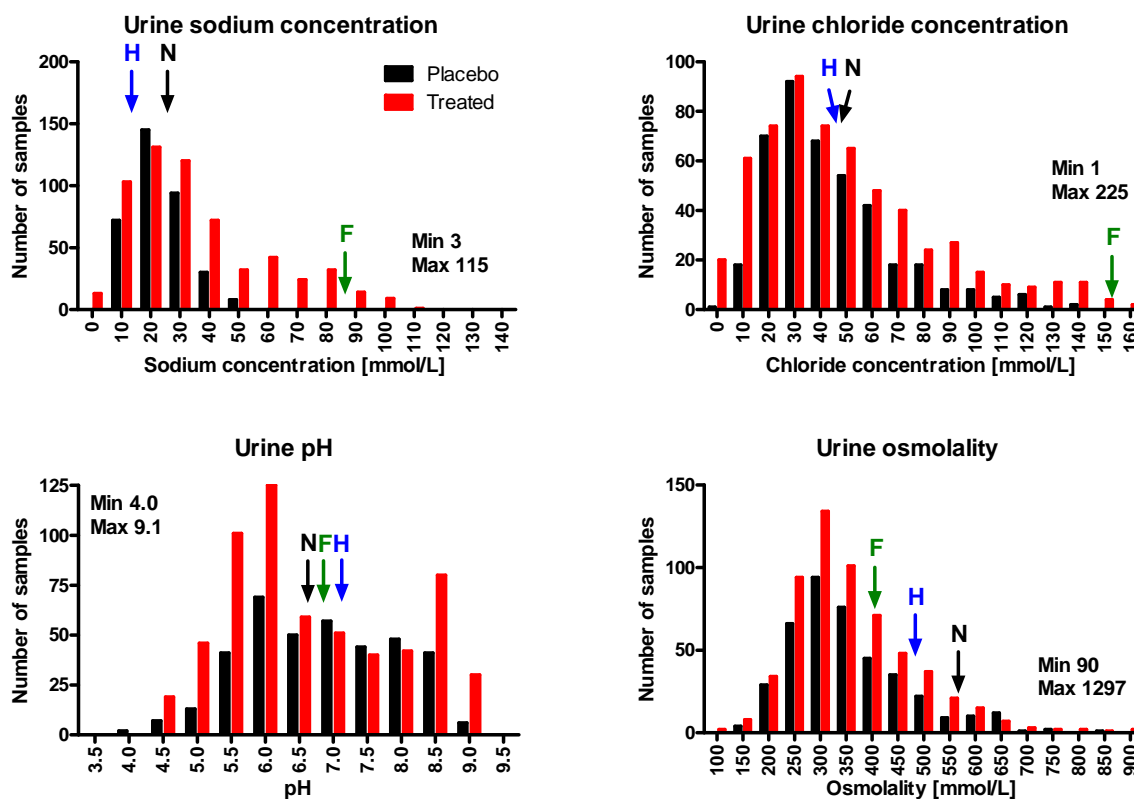

### Supplement Figure 2: sodium and chloride concentrations, pH and osmolality in rat urine

Male and female rats were treated with natrosol, furosemide, formoterol, spironolactone, amiloride, acetaminophen, adriamycin or hydrochlorothiazide and urine was collected at 0 - 4 h, 4 - 8 h and 8 - 24 h post administration. Rats were fed before the experiment and fasted during the experiment, leading to a mixture of urine samples from fed and fasted animals.  $\text{Na}^+$  and  $\text{Cl}^-$  concentrations, pH and osmolality were measured, and histograms were plotted showing normal and pharmacological ranges of the parameters. Data include samples from 349 - 411 vehicle-treated animals and 582 - 589 reference compound-treated animals. Additionally, values from the original samples of the stability test are plotted. Abbreviations: N natrosol, F furosemide, H HCBD.
